# Supplementary material
Source: publisher figshare collection journal article supplement (https://acs.figshare.com/ndownloader/files/19151783)
Supplement: Supplementary file 1 [file 19151783]

## Supporting Information

### **Carbon Nanotube Transistors as Gas Sensors: Response Differentiation Using Polymer Gate Dielectrics**

*François Lapointe\*, Jianfu Ding and Jacques Lefebvre*

National Research Council Canada  
1200 Montreal Rd, Ottawa, Ontario  
Canada K1A 0R6

\* e-mail: francois.lapointe@nrc-cnrc.gc.ca

**Table S1:** List of polymer dielectrics. DMF stands for dimethylformamide. PVP-pMSSQ stands for poly(vinylphenol) poly(methylsilsesquioxane) blend. CNN-FET data for nylons in bold fonts are presented in Figure S5. Dielectric parameters have not been measured but were obtained from supplier datasheets or from the literature. Reported values for nylons can vary by 10-20%.

| Name                                 | Supplier/ Brand                   | Dielectric constant/Loss | Method                               |
|--------------------------------------|-----------------------------------|--------------------------|--------------------------------------|
| <b>PA6</b>                           | <b>Scientific Polymer, Inc.</b>   | <b>3.6/0.2</b>           | <b>m-cresol, spin coating</b>        |
| <b>PA66</b>                          | <b>Scientific Polymer, Inc.</b>   | <b>3.2/0.2</b>           | <b>m-cresol, spin coating</b>        |
| PA66                                 | Sigma Aldrich 181129              | 3.2                      | m-cresol, spin coating               |
| <b>PA69</b>                          | <b>Scientific Polymer, Inc.</b>   | <b>3.2/0.02</b>          | <b>m-cresol, spin coating</b>        |
| <b>PA610</b>                         | <b>Scientific Polymer, Inc.</b>   | <b>4.7/0.09</b>          | <b>m-cresol, spin coating</b>        |
| PA610                                | Dupont Zytel LC3030               | 3.9                      | m-cresol, spin coating               |
| PA610                                | Dupont Zytel LC3090               | 3.9                      | m-cresol, spin coating               |
| <b>PA612</b>                         | <b>Scientific Polymer, Inc.</b>   | <b>3.6/0.02</b>          | <b>m-cresol, spin coating</b>        |
| PA612                                | RTP200 white                      | 3.6                      | m-cresol, spin coating               |
| PA612                                | RTP200 blue                       | 3.6                      | m-cresol, spin coating               |
| PA612                                | Dupont Zytel 151L                 | 3.6                      | m-cresol, spin coating               |
| PA1010                               | Dupont Zytel LC1600               | 3.6                      | m-cresol, spin coating               |
| <b>PA11</b>                          | <b>Scientific Polymer, Inc.</b>   | <b>3.9/0.2</b>           | <b>m-cresol, spin coating</b>        |
| PA11                                 | Arkema Rilsamid                   | 3.9                      | m-cresol, spin coating               |
| PA12                                 | Scientific Polymer, Inc.          | 3.9                      | m-cresol, spin coating               |
| PA12                                 | Arkema Kynar                      | 3.9                      | m-cresol, spin coating               |
| PA12                                 | Evonik Vestamid X7377             | 3.8                      | m-cresol, spin coating               |
| <b>PA12</b>                          | <b>Evonik Vestamid L1670</b>      | <b>3.8/0.05</b>          | <b>m-cresol, spin coating</b>        |
| <b>PA6T</b>                          | <b>Dupont Zytel HTNE8200</b>      | <b>3.7/0.012</b>         | <b>m-cresol, spin coating</b>        |
| <b>PA6(3)T</b>                       | <b>Scientific Polymer, Inc.</b>   | <b>4.6/0.025</b>         | <b>m-cresol or DMF, spin coating</b> |
| <b>MXD6</b>                          | <b>Mitubishi</b>                  | <b>3.9/0.01</b>          | <b>m-cresol, spin coating</b>        |
| <b>PA9T</b>                          | <b>Kuraray GC72010</b>            | <b>3.8/0.01</b>          | <b>m-cresol, spin coating</b>        |
| <b>PA10T</b>                         | <b>Evonik CX7323</b>              | <b>3.6/0.01</b>          | <b>m-cresol, spin coating</b>        |
| PA10T                                | Evonik HTM3000                    | 3.6                      | m-cresol, spin coating               |
| Cellulose Acetate                    | Sigma Aldrich                     | 5.6/0.03                 | DMF, spin coating                    |
| Cell. Nitrate (Collodion)            | Sigma Aldrich                     | 6.4                      | DMF, spin coating                    |
| Cyanoethyl Cell. (CR-S)              | Shin-Etsu Chemical Co             | 13                       | DMF, spin coating                    |
| Poly-4vinylpyridine                  | Scientific Polymer, Inc.          | 3.2                      | DMF, spin coating                    |
| Poly-(4vinylpyridine-co-styrene 10%) | Scientific Polymer, Inc.          | 3.1                      | DMF, spin coating                    |
| PVDF                                 | Solvay Solef 9009                 | 7.5                      | DMF, spin coating                    |
| Parylene C                           | Specialty Coating Systems (Kisco) | 3.1/0.02                 | Vapor condensation                   |
| Parylene HT                          | Specialty Coating Systems (Kisco) | 2.2/0.0002               | Vapor condensation                   |
| Teflon AF                            | Dupont                            | 1.9                      | Spin coating                         |
| Merck Lisicon D139-FC43              | Merck, D139-FC43-045              | 2                        | Spin coating                         |
| PVP-pMSSQ                            | Xerox Xdi-dcs                     | 3                        | Spin coating                         |

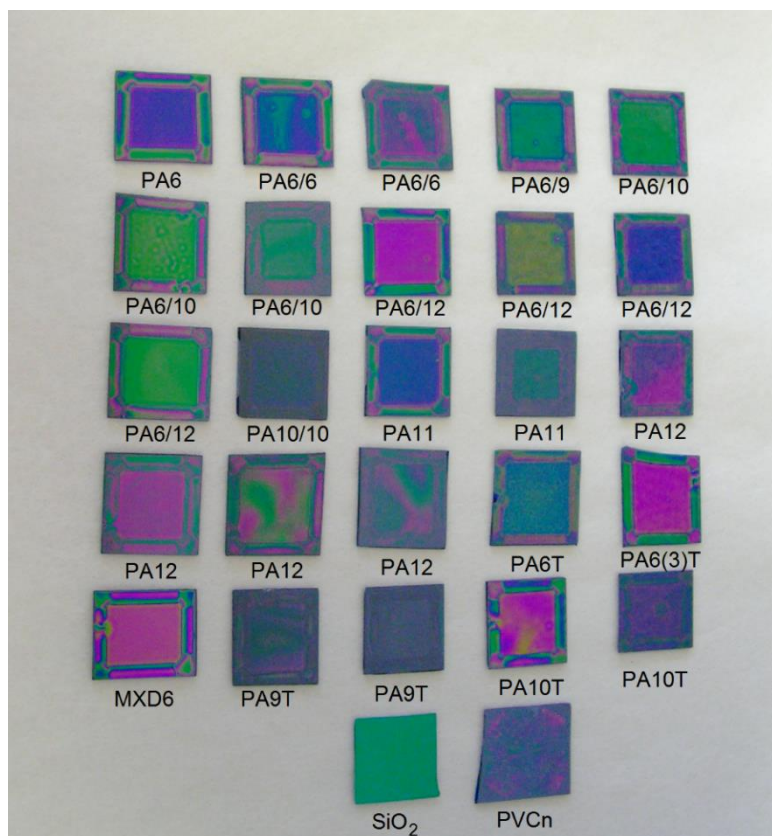

**Figure S1:** Optical image of a set of nylon polymers spin-coated on Si/SiO<sub>2</sub> substrate.

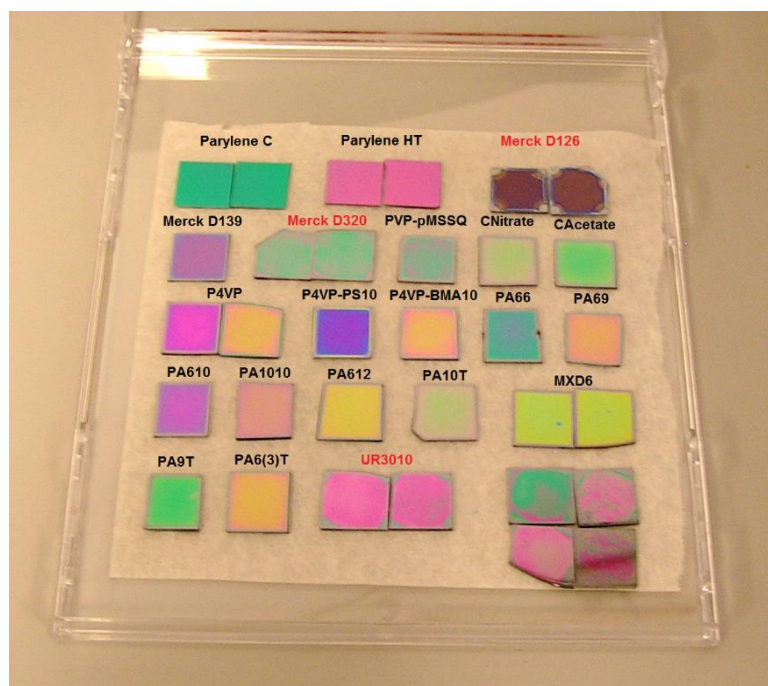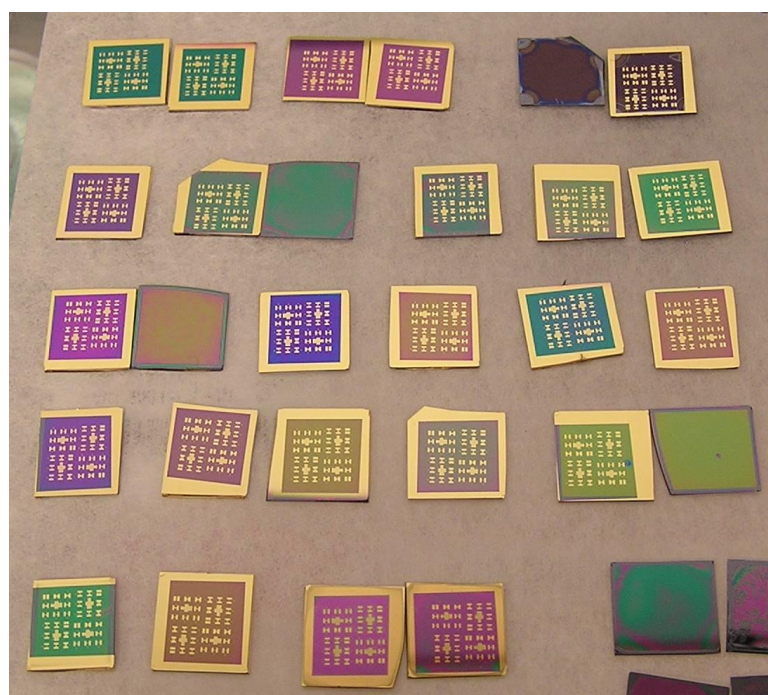

**Figure S2:** Optical image of a set of polymer spin coated on Si/SiO<sub>2</sub> substrate. Polymers marked in red were degraded during nanotube deposition by soaking in toluene and did not produce working transistors.

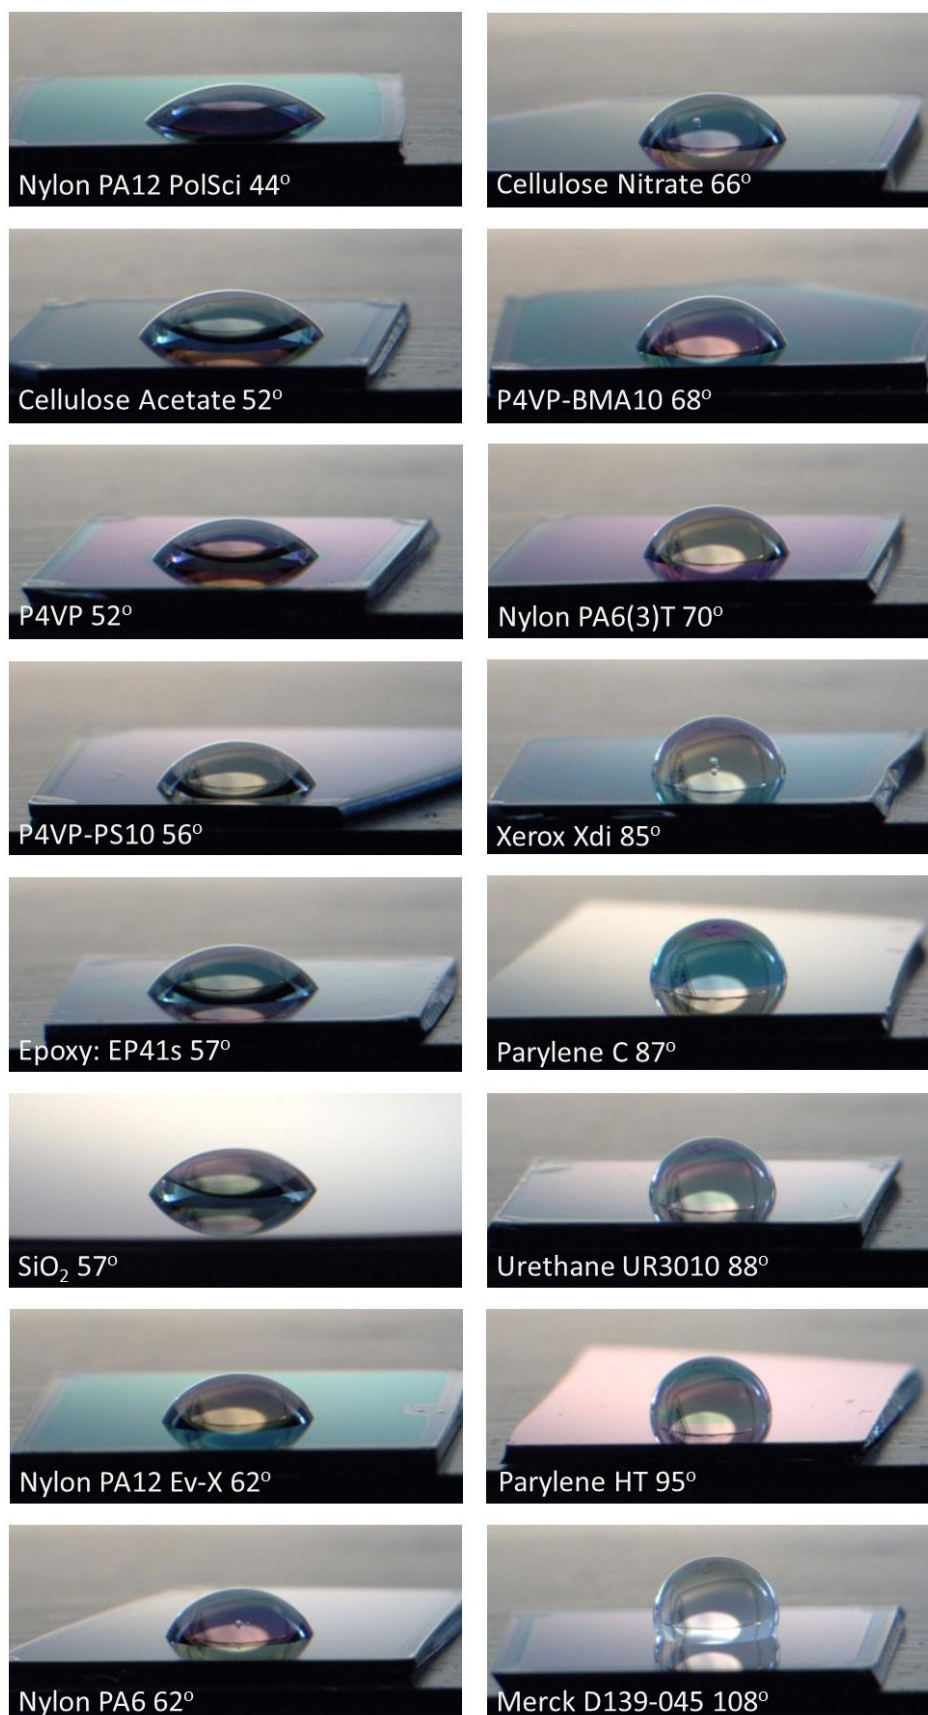

**Figure S3:** Water contact angle for a representative set of polymeric materials.



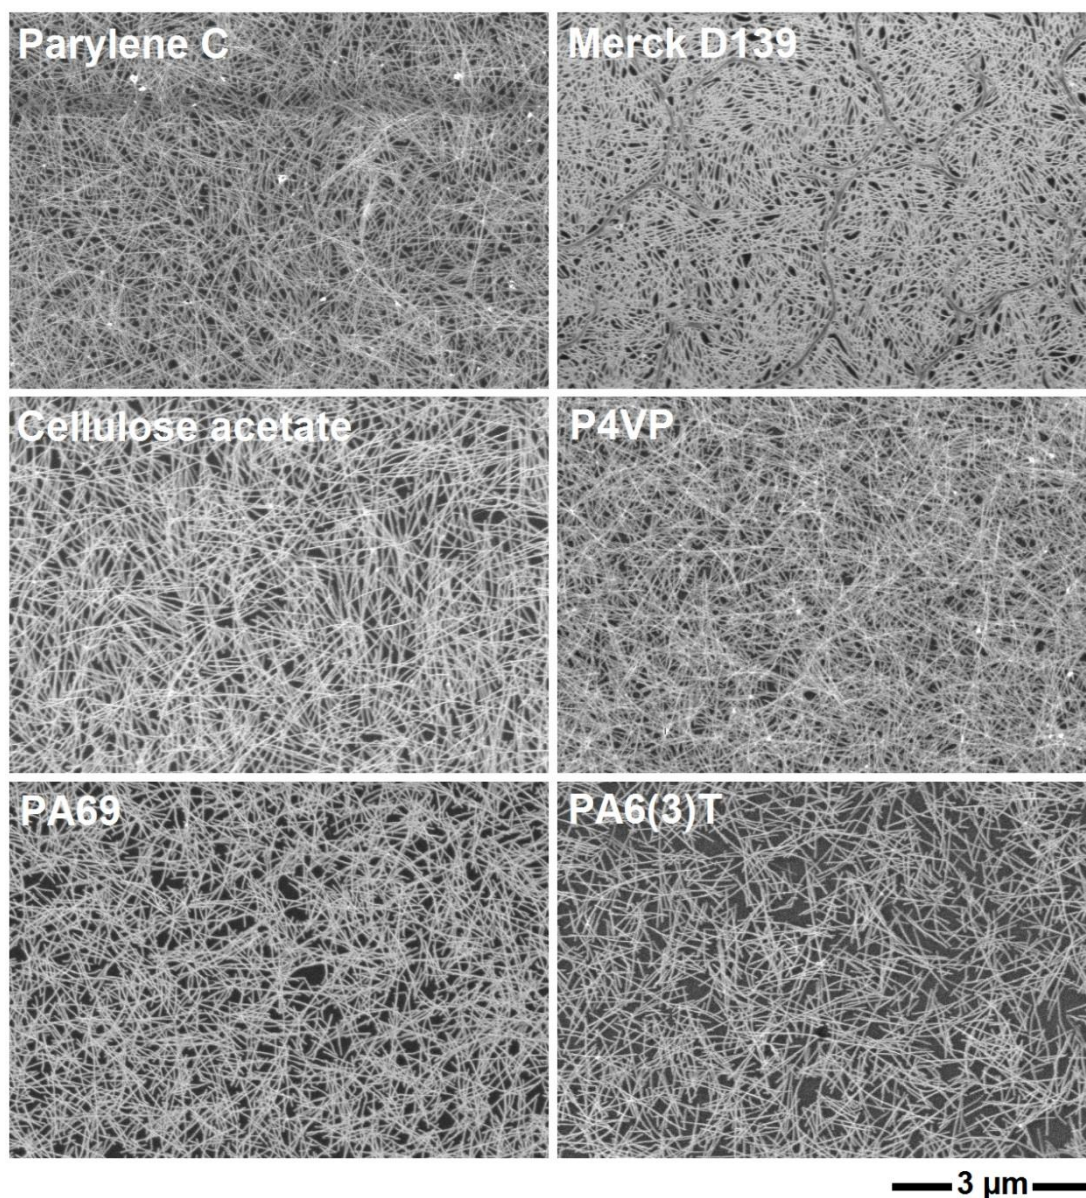

**Figure S4:** Scanning electron micrographs of single-walled carbon nanotubes on six polymer surfaces. Images were acquired using Hitachi S4700 at 0.5 kV, 15  $\mu$ A and 5.6 mm working distance in all cases.

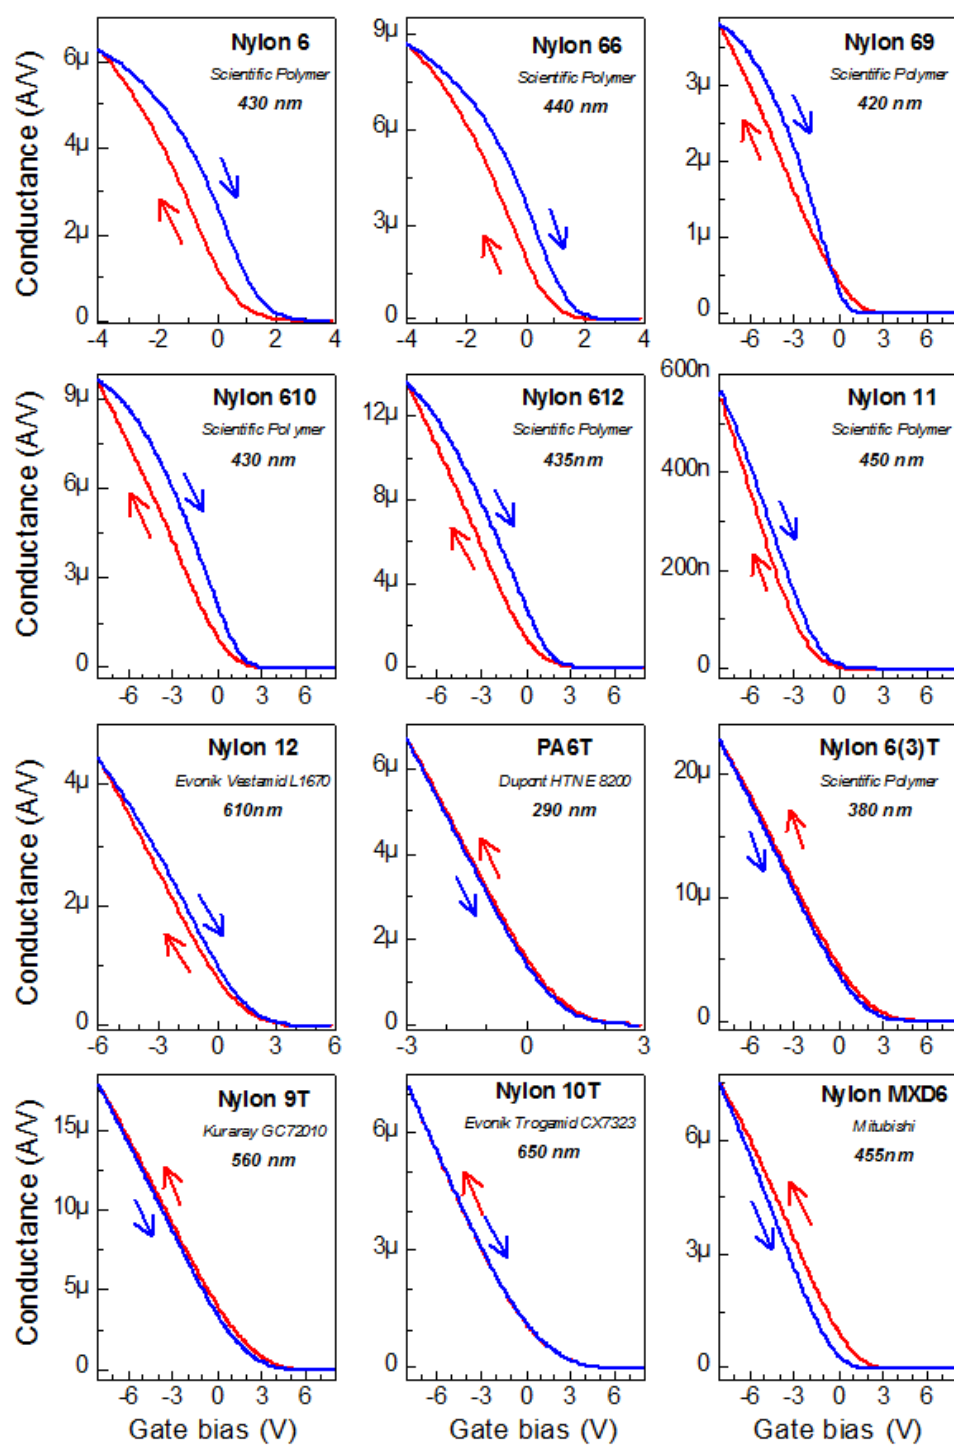

**Figure S5:** Transfer characteristics for CNN-FETs using nylons as polymer gate dielectrics.

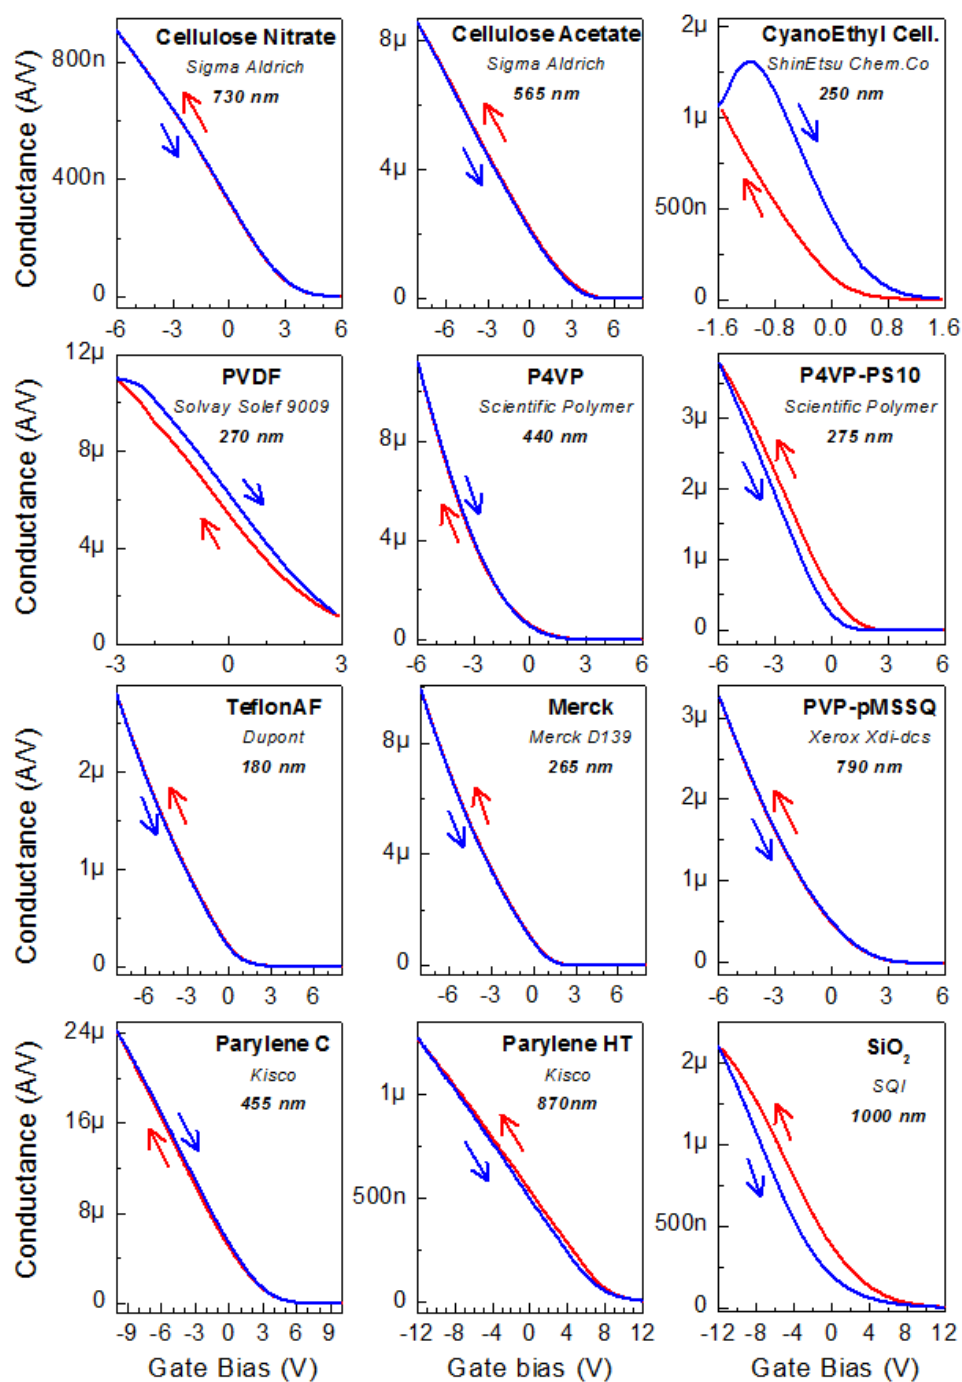

**Figure S6:** Transfer characteristics for CNN-FETs using various polymers as gate dielectrics.



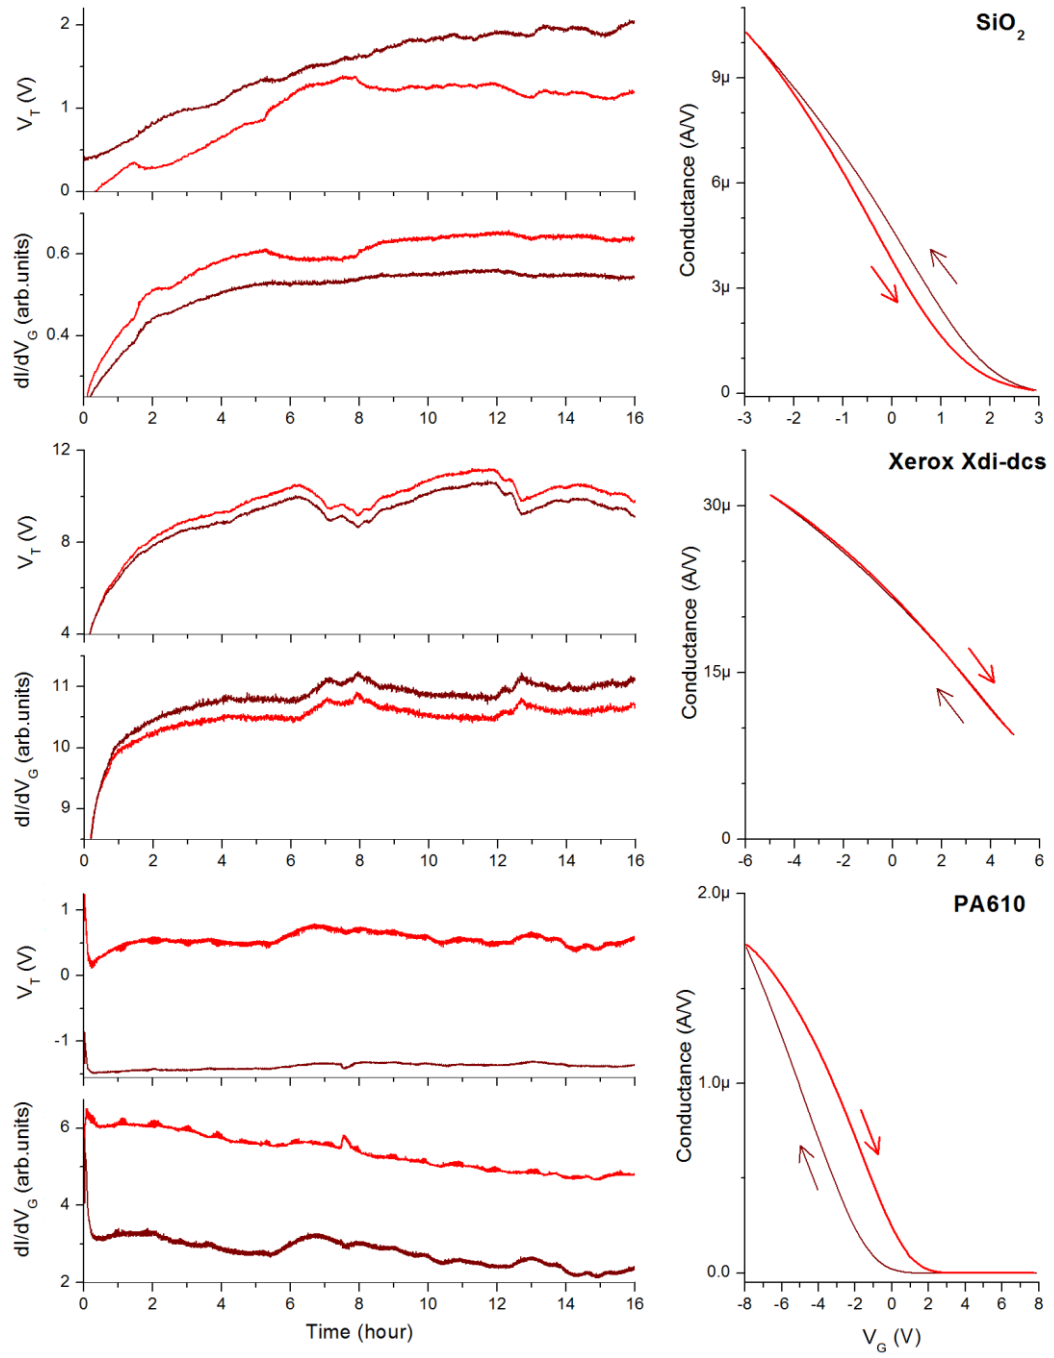

**Figure S7:** Time evolution of transistor threshold voltage ( $V_T$ ) and transconductance ( $dI/dV_G$ ) for three gate dielectric materials in ambient air.

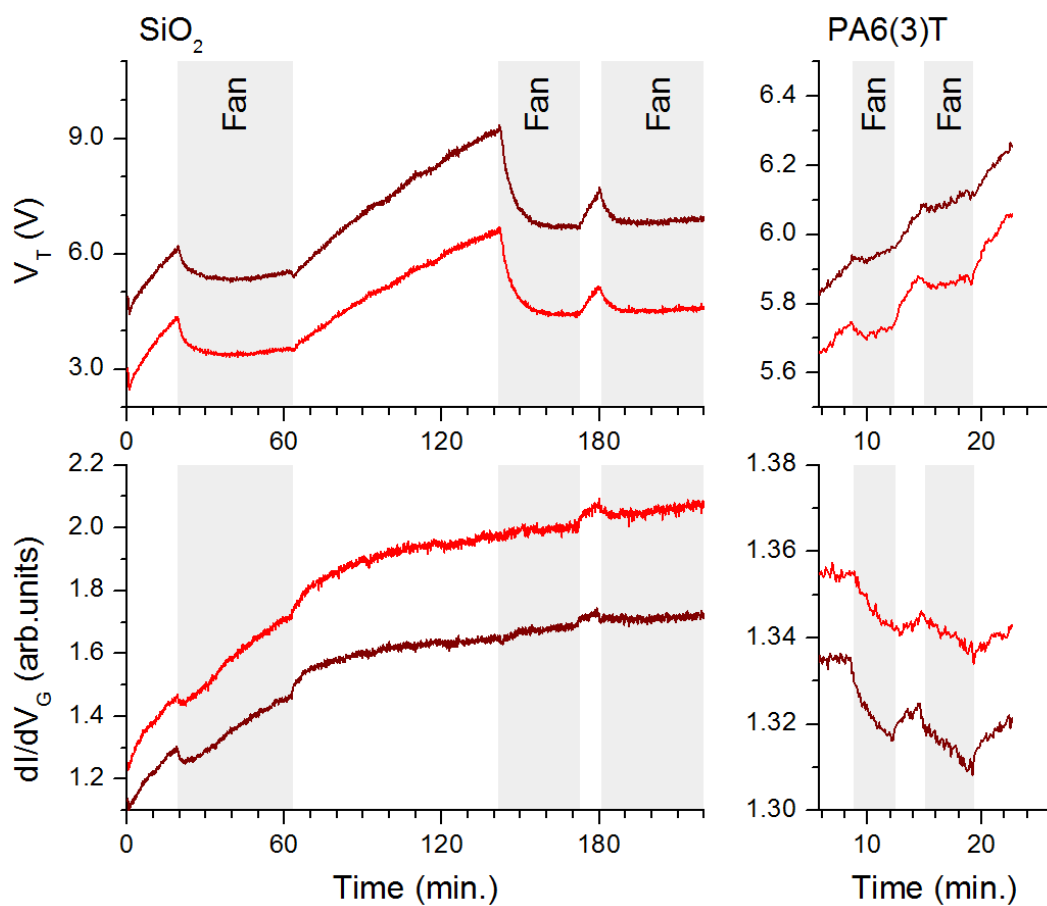

**Figure S8:** Effect of deionizing fan on the time evolution of transistor threshold voltage ( $V_T$ ) and transconductance ( $dI/dV_G$ ) for two gate dielectric materials in air ambient.

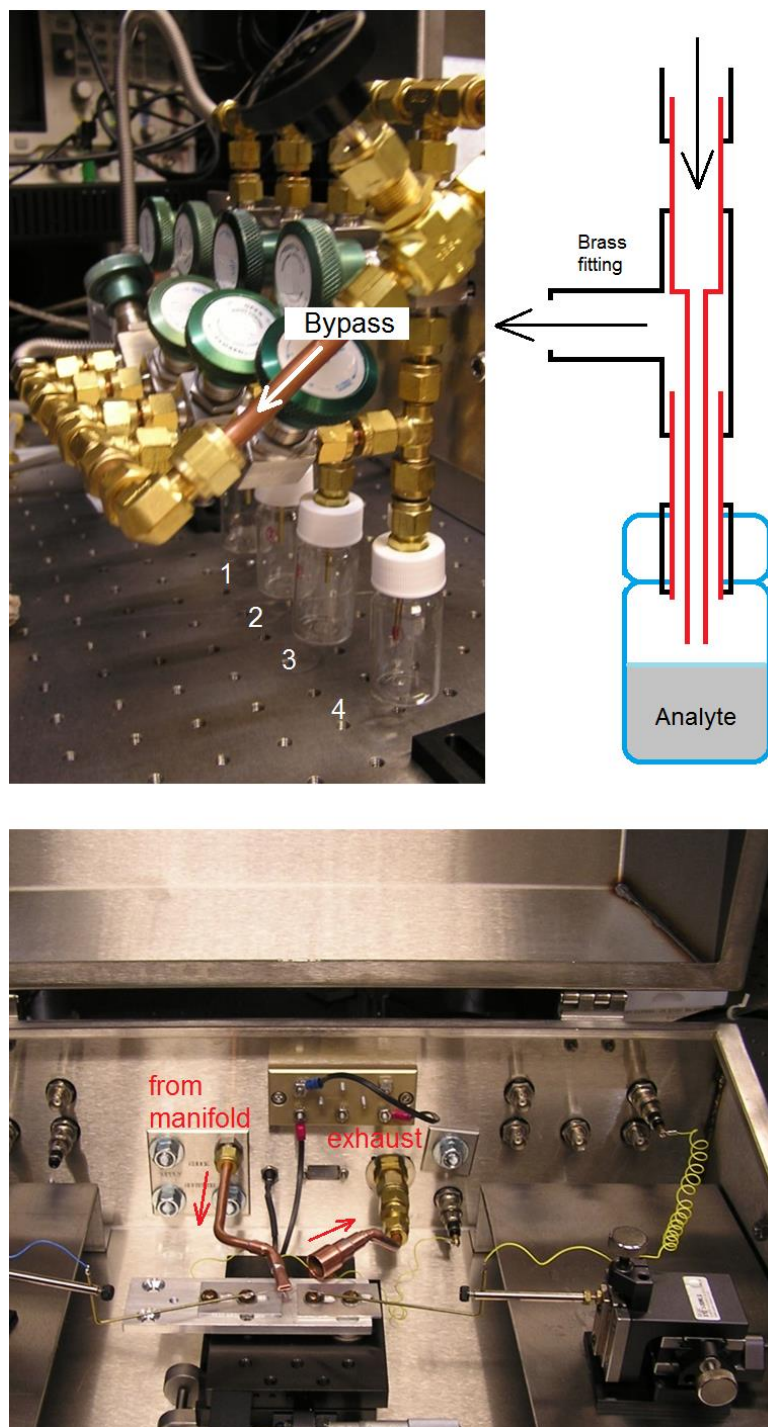

**Figure S9:** Experimental setup for exposure to volatile compounds. Top left is a picture of the manifold with four bubblers in parallel with a bypass line. Top right is an illustration of the tubing configuration for the incoming and outgoing flow. Bottom is a picture of the probe station with incoming and exhaust copper tubing.

**Table S2:** Calculated analyte concentration from measured mass loss.

| Analyte                       | Molecular mass (g/mol) | Ambient vapor pressure (mmHg) | Mass loss / Duration | Volume concentration (mg/L) | Mass ppm | Mole ppm |
|-------------------------------|------------------------|-------------------------------|----------------------|-----------------------------|----------|----------|
| H <sub>2</sub> O <sub>2</sub> | 34                     | 2                             | 62/213'              | 0.6                         | 480      | 430      |
| n-Octane                      | 114                    | 11                            | 145mg/71'            | 4.1                         | 3400     | 900      |
| NaOCl                         | 74                     | 15                            | 28mg/107'            | 0.05                        | 42       | 17       |
| Vinegar (5% wt)               | 60                     | 16                            | 46mg/114'            | .04                         | 30       | 15       |
| H <sub>2</sub> O              | 18                     | 17                            | 65mg/189'            | 0.7                         | 580      | 950      |
| Toluene                       | 92                     | 25                            | 333mg/105'           | 6.3                         | 5200     | 1700     |
| Isopropanol                   | 60                     | 33                            | 202mg/71'            | 6.6                         | 5500     | 2750     |
| Heptane                       | 100                    | 40                            | 313mg/70'            | 8.9                         | 7400     | 2200     |
| Methanol                      | 32                     | 95                            | 400mg/75'            | 11                          | 9200     | 8600     |
| Tetrahydrofuran               | 72                     | 132                           | 246mg/36'            | 14                          | 11500    | 4750     |
| Acetone                       | 58                     | 184                           | 452mg/32'            | 28                          | 23000    | 12000    |
|                               |                        |                               |                      |                             |          |          |
| Tripropylamine                | 143                    | 0.02 (1.5)                    | 333mg/105'           | .008                        | 7        | 1.4      |
| diIsobutylamine               | 129                    | 0.02 (7)                      | 333mg/105'           | .007                        | 6        | 1.4      |
| Isobutylamine                 | 73                     | 0.02 (138)                    | 333mg/105'           | .004                        | 3        | 1.4      |
| Triethylamine                 | 101                    | 0.02 (57)                     | 333mg/105'           | .006                        | 5        | 1.4      |

In order to calculate the analyte concentration, one bubbler in Figure S9 was operated at 500 sccm for a duration sufficient to obtain a loss of liquid measurable on a balance. The second column in Table S2 reports the measured values from which ppm concentrations are calculated.

Using the measured mass loss and duration, the volume concentration of analyte is given by:

$$\frac{\Delta M}{\Delta t * 0.5 \text{ L/min}}$$

The mass ppm ratio is given by dividing the volume concentration by 1.2 g/L, the density of air. A mole ppm ratio is obtained by converting mass numbers into moles (~30g/mol for air). Concentrations in ppm mole fraction are quoted in the text.

For amine solutions diluted with toluene, ppm values for toluene were used and scaled using the partial pressure (0.02 mmHg) of the amine with respect to toluene (25 mmHg).

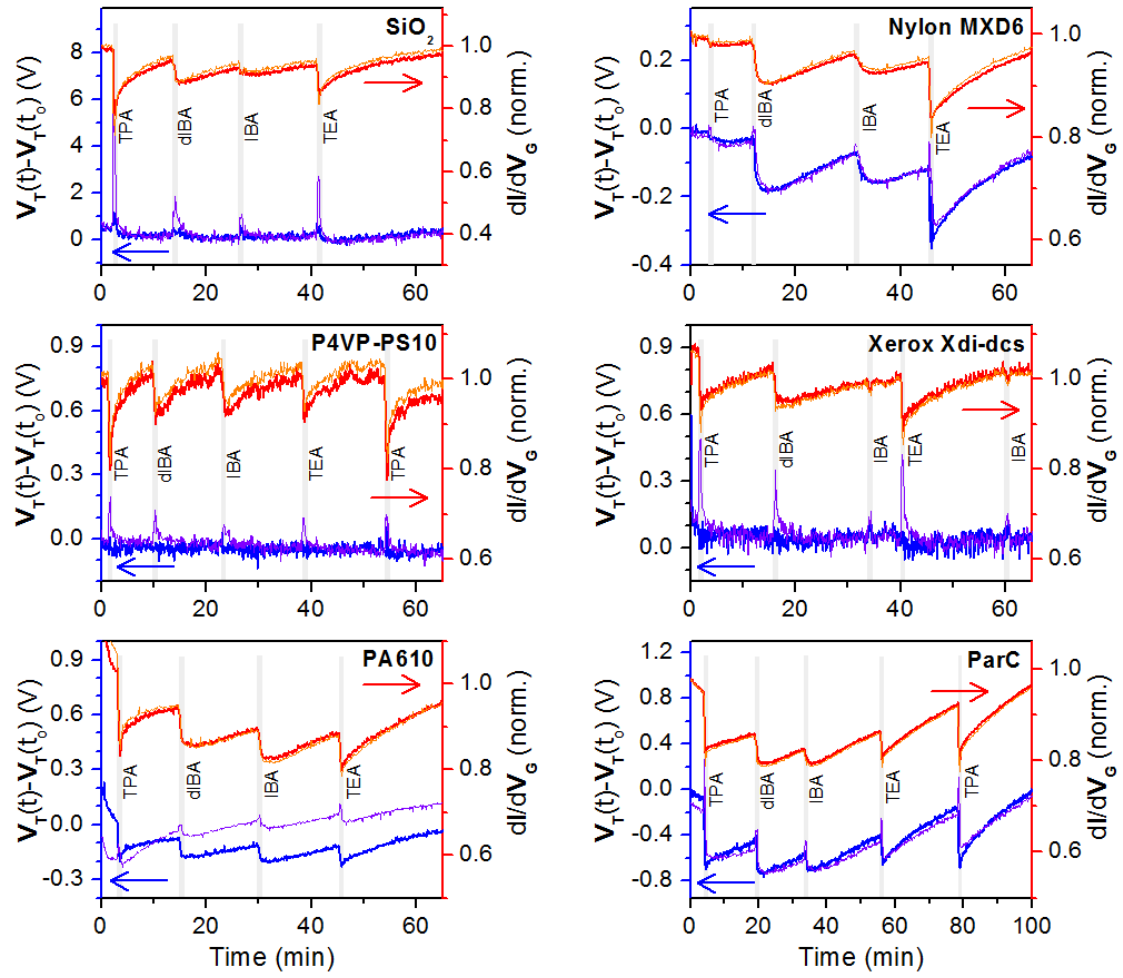

**Figure S10:** Evolution of threshold voltage ( $V_T$ ) and transconductance ( $dI/dV_G$ ) for six transistors with different gate dielectrics upon exposure to four volatile amines in a toluene solution: tripropylamine (TPA), diisobutylamine (dIBA), isobutylamine (IBA) and trimethylamine (TEA). The molar concentration in air is 1.4 ppm for the four amines.
